# Supplementary material for: Lactiplantibacillus plantarum-12 Alleviates Inflammation and Colon Cancer Symptoms in AOM/DSS-Treated Mice through Modulating the Intestinal Microbiome and Metabolome
Source: MDPI journal article supplement (doi:10.3390/nu14091916), 2022-05-03
Supplement: s1 [file s1]

## Supplementary materials

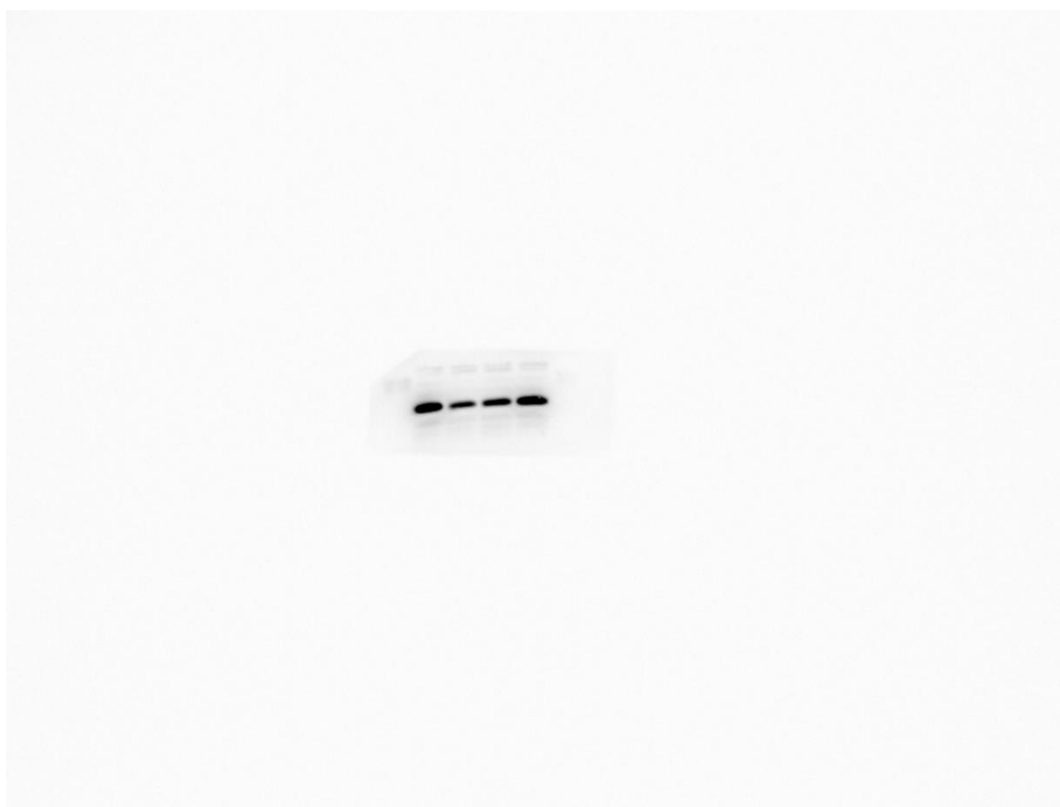

Claudin-1

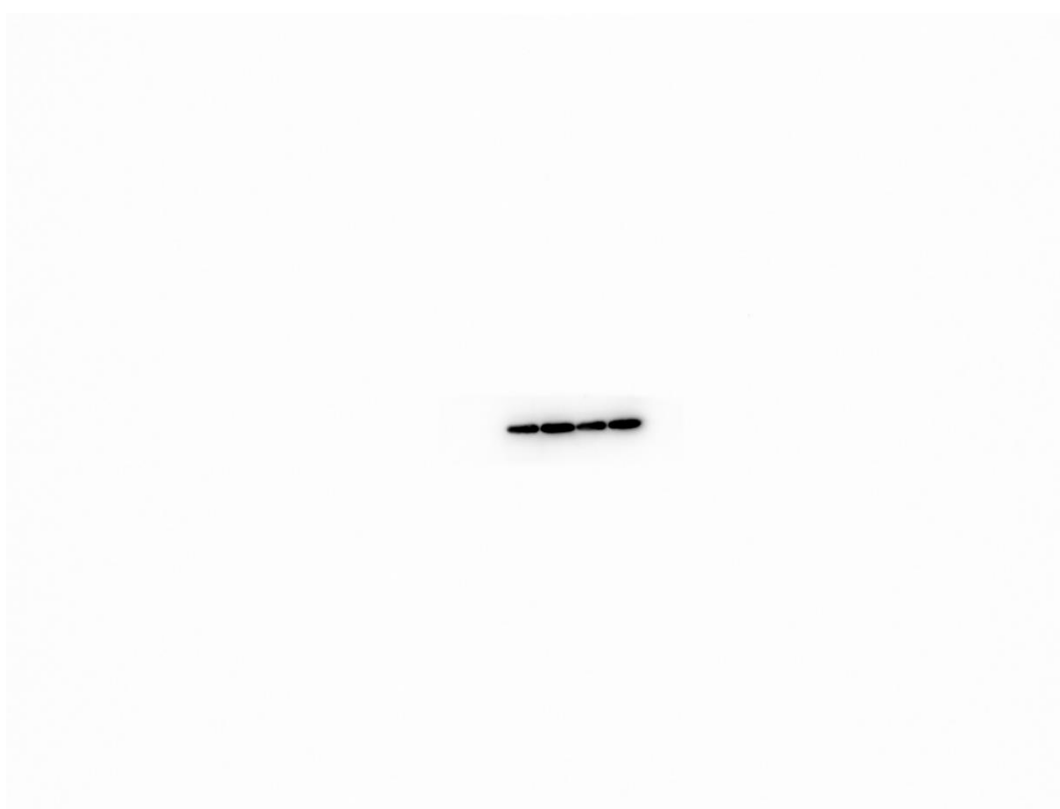

β-actin

Figure 4B

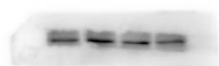

p65

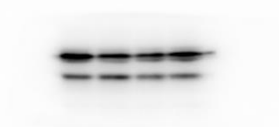

IκB-α

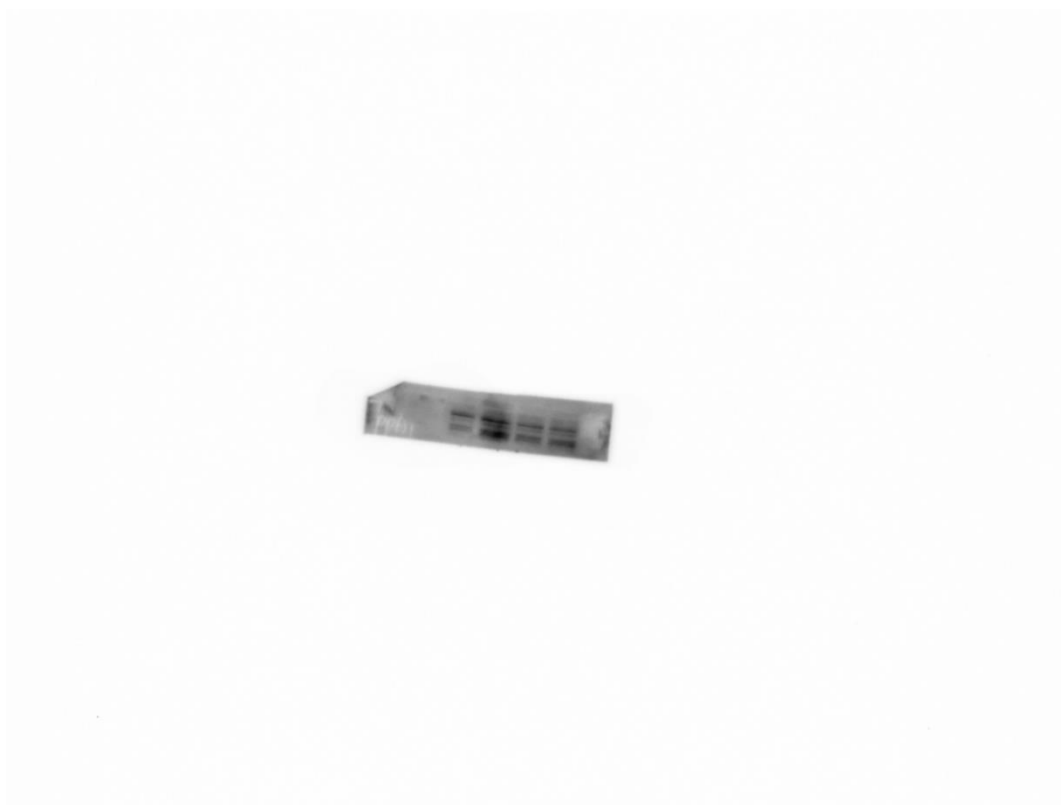

p-p65

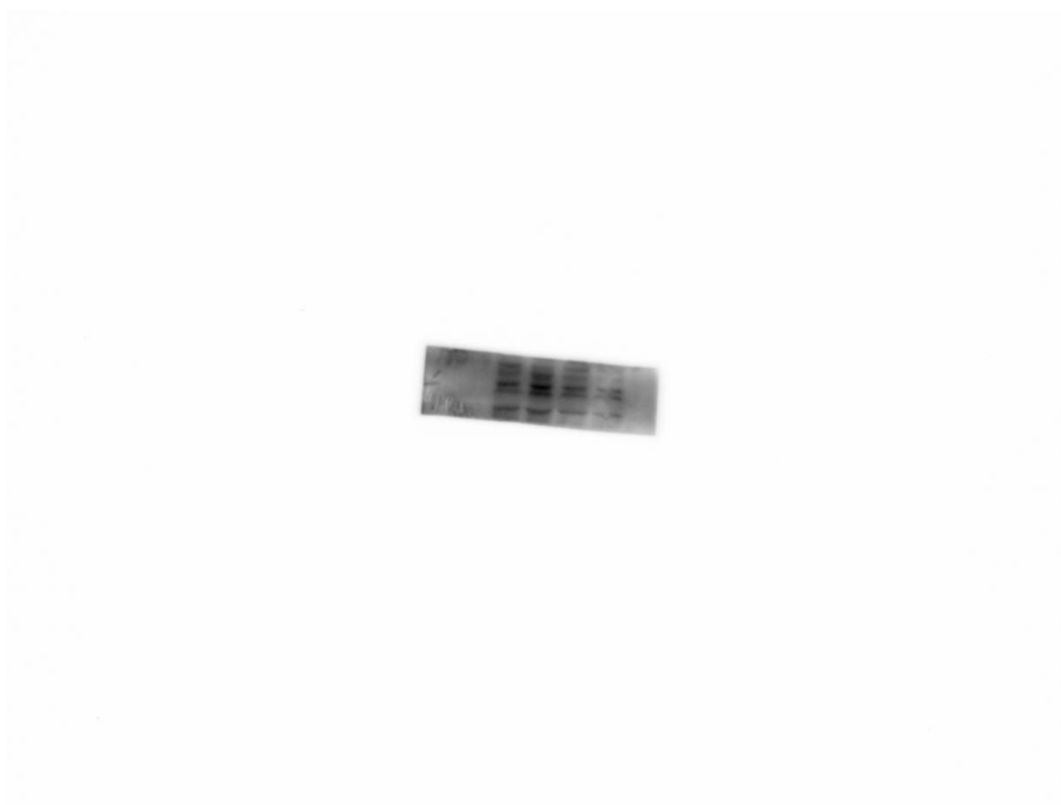

p-p38

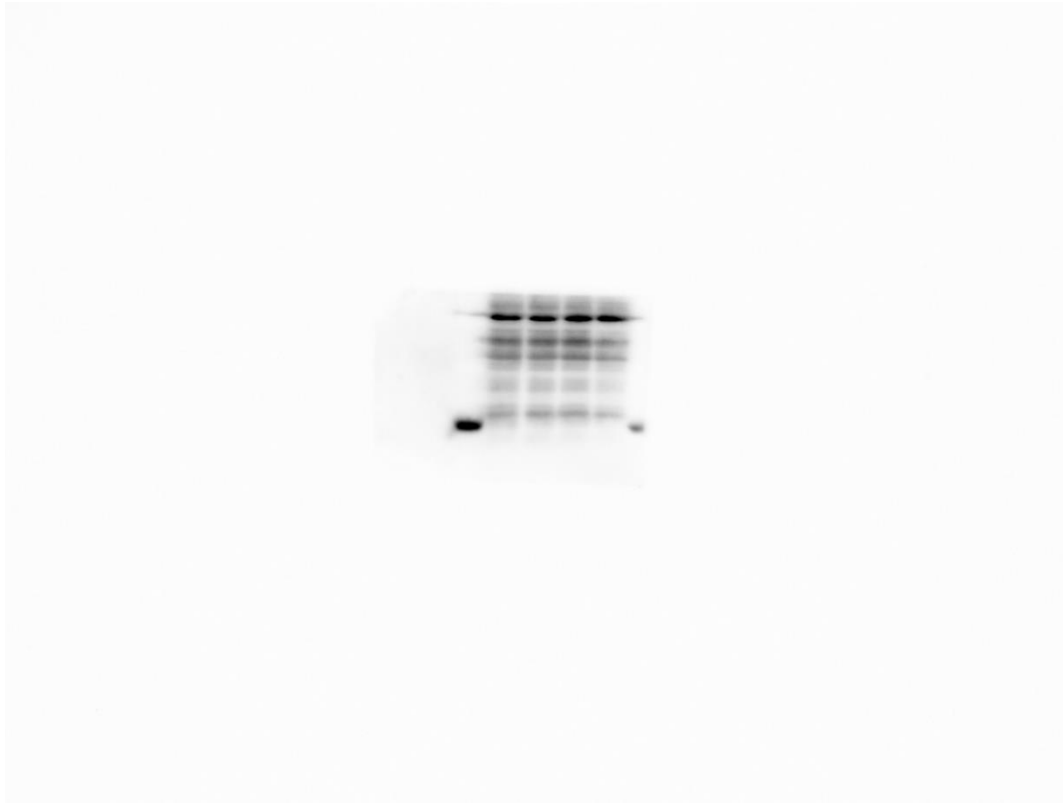

$\beta$ -actin

Figure 5A

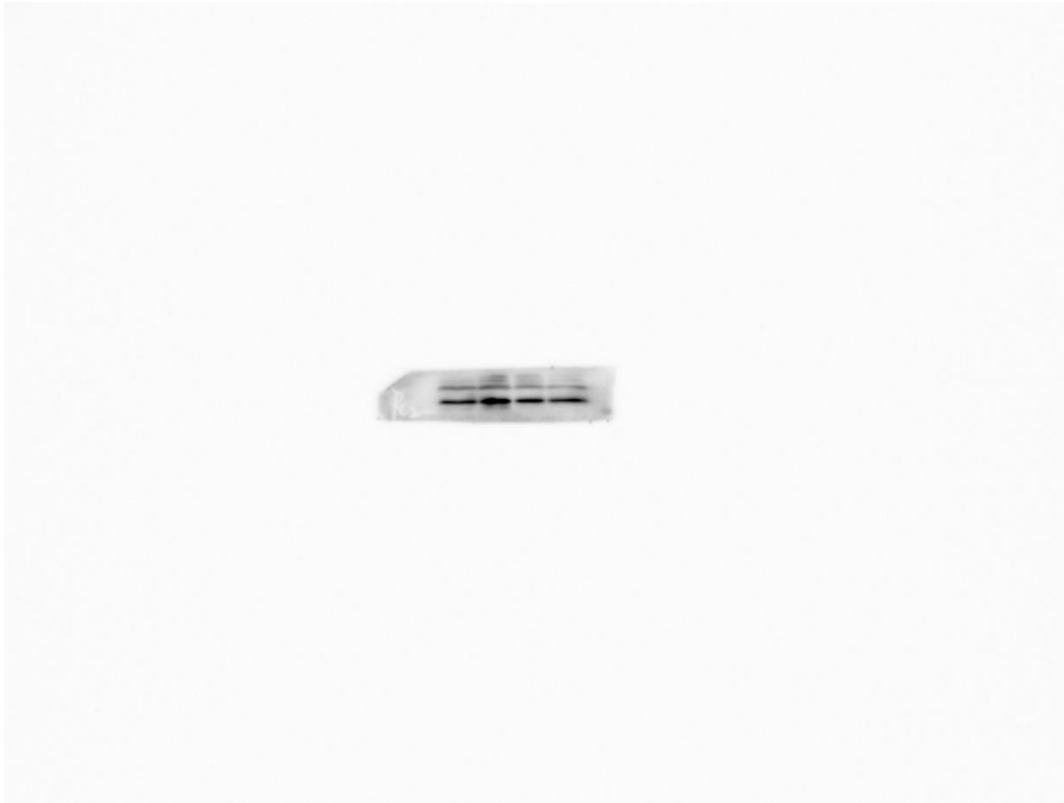

PCNA

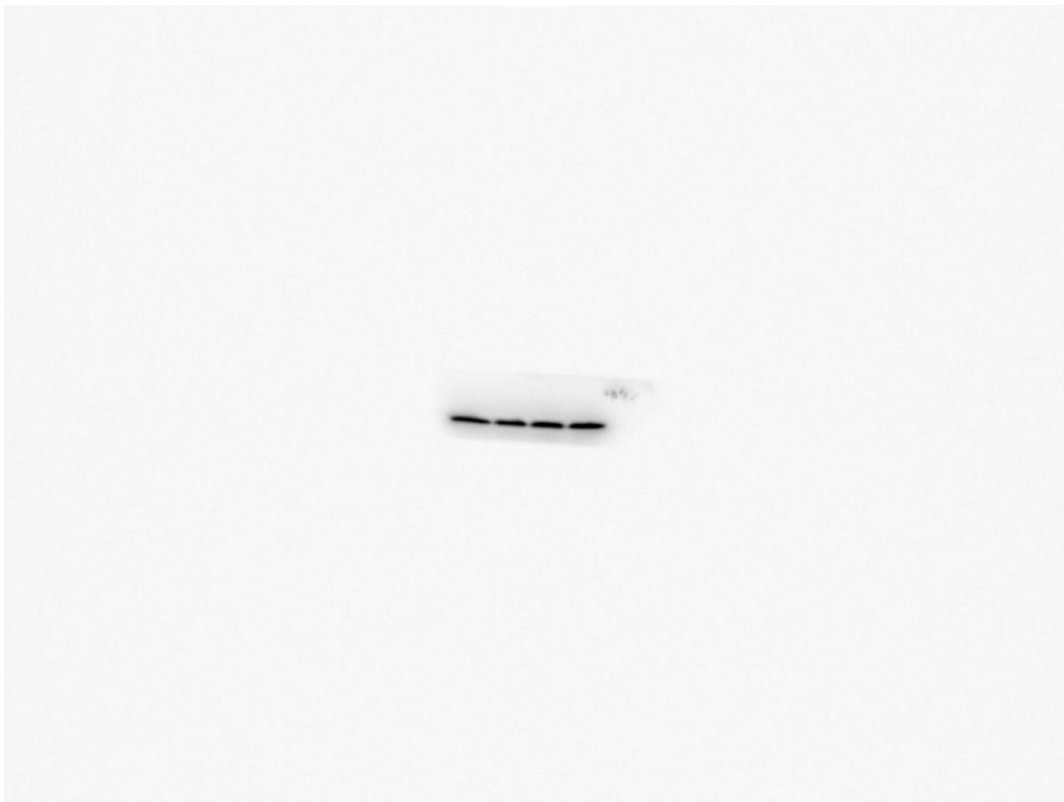

Bax

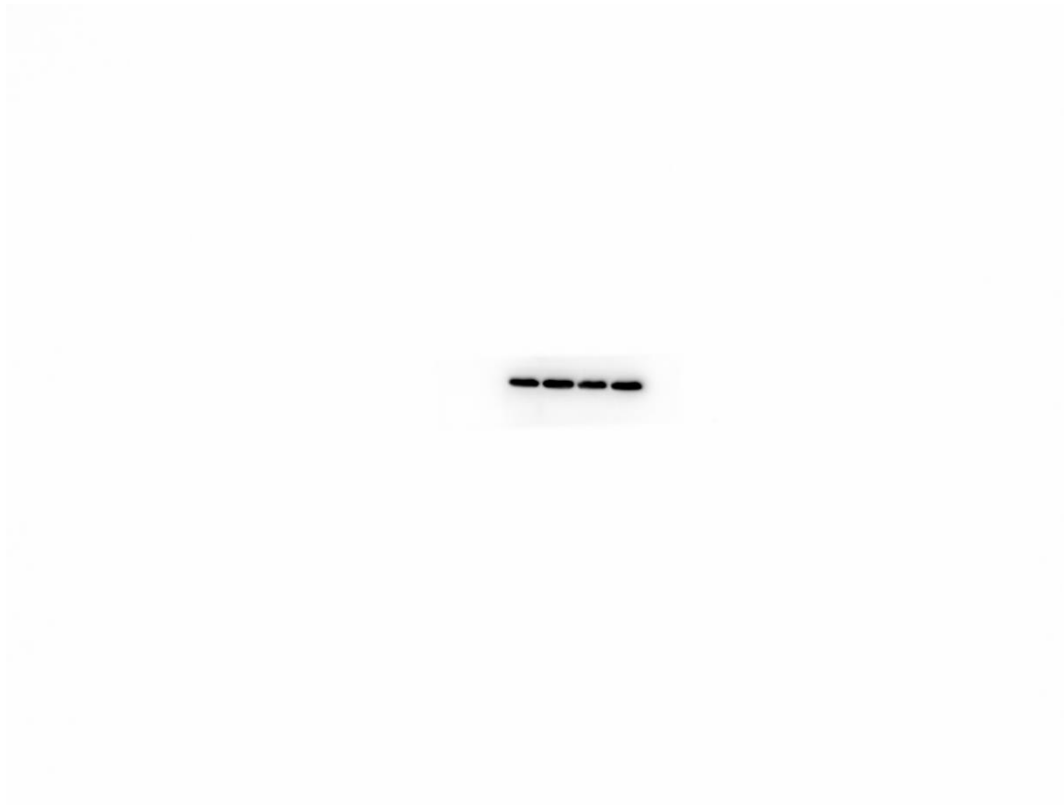

$\beta$ -actin

Figure 6A

**Figure S1.** Original images of Western blots.
